# Supplementary material for: A Critical Role for Dna2 at Unwound Telomeres
Source: PubMed Central journal article supplement (PMC5937186; doi:10.1534/genetics.118.300809), 2018-03-20
Supplement: 129FileS1.pdf [file 129FileS1.pdf]

## SUPPLEMENTAL MATERIAL

**Table S1. Yeast strains used.**

*S. cerevisiae* strains used are in the W303 genetic background (*ade2-1 can1-100 trp1-1 leu2-3,112 his3-11,15 ura3 GAL+ psi+ ssd1-d2 RAD5+*), unless stated otherwise. Haploid strain numbers are prefixed DLY, diploids are DDY. Yeast strains are ordered by strain number.

| Strain<br>(DLY) | Relevant Genotype                   | Origin | Related<br>Figures                 |
|-----------------|-------------------------------------|--------|------------------------------------|
| 658             | <i>MAT α rad9::HIS3</i>             |        | S4, S5                             |
| 1095            | <i>MAT a chk1::HIS3</i>             |        | S4, S5                             |
| 1108            | <i>MAT a cdc13-1</i>                |        | 3, S3, S5, S10                     |
| 1195            | <i>MAT α cdc13-1</i>                |        | S4, S5, S10                        |
| 1272            | <i>MAT α exo1::LEU2</i>             |        | 3, S3, S5                          |
| 1273            | <i>MAT α exo1::LEU2</i>             |        | S4, S5                             |
| 1326            | <i>MAT α mec1::HIS3 sml1::KANMX</i> |        | 3, S2b, S3, S5,<br>S6              |
| 1408            | <i>MAT a yku70::HIS3 exo1::LEU2</i> |        | 3, S3, S5                          |
| 1409            | <i>MAT α yku70::HIS3 exo1::LEU2</i> |        | S4, S5                             |
| 1412            | <i>MAT a yku70::HIS3</i>            |        | S4, S5                             |
| 1577            | <i>MAT a sae2::TRP1</i>             |        | 3, S3, S5                          |
| 1578            | <i>MAT α sae2::TRP1</i>             |        | S4, S5                             |
| 1845            | <i>MAT a yku70::HIS3 mre11:URA3</i> |        | 3, S3, S5, S6                      |
| 1846            | <i>MAT α yku70::HIS3 mre11:URA3</i> |        | S4, S5                             |
| 2147            | <i>MAT a tlc1::HIS3</i>             |        | S6                                 |
| 3001            | <i>MAT α WT</i>                     |        | 2b, 3, S2b, S3,<br>S5, S6, S8, S10 |
| 4106            | <i>MAT α cdc13-1 mph1::KANMX</i>    |        | S10                                |

---

|       |                                                   |                                    |
|-------|---------------------------------------------------|------------------------------------|
| 4107  | <i>MAT</i> $\alpha$ <i>cdc13-1 mph1::KANMX</i>    | S10                                |
| 4108  | <i>MAT</i> $\alpha$ <i>cdc13-1 mph1::KANMX</i>    | S10                                |
| 4282  | <i>MAT</i> <i>a mph1::KANMX</i>                   | S10                                |
| 4283  | <i>MAT</i> <i>a mph1::KANMX</i>                   | S10                                |
| 4285  | <i>MAT</i> <i>a cdc13-1 mph1::KANMX</i>           | S10                                |
| 4286  | <i>MAT</i> <i>a cdc13-1 mph1::KANMX</i>           | S10                                |
| 4457  | <i>MAT</i> $\alpha$ <i>mre11::URA3</i>            | 3, S3, S5                          |
| 4458  | <i>MAT</i> $\alpha$ <i>mre11::URA3</i>            | S4, S5                             |
| 4690  | <i>MAT</i> <i>a pif1::KANMX dna2::NAT</i>         | 3, S3, S5                          |
| 4691  | <i>MAT</i> $\alpha$ <i>pif1::KANMX dna2::NAT</i>  | S4, S5                             |
| 4872  | <i>MAT</i> <i>a pif1::NAT</i>                     | 3, S3, S5                          |
| 5394  | <i>MAT</i> $\alpha$ <i>pif1::NAT</i>              | S4, S5                             |
| 6855  | <i>MAT</i> $\alpha$ <i>mec1::TRP1 sml1::URA3</i>  | S2b, S4, S5                        |
| 6885  | <i>MAT</i> <i>a yku70::LEU2</i>                   | 3, S3, S5                          |
| 7173  | <i>MAT</i> <i>a ddc1::KANMX</i>                   | S2b, S4, S5, S6                    |
| 7174  | <i>MAT</i> $\alpha$ <i>ddc1::KANMX</i>            | S2b                                |
| 7177  | <i>MAT</i> <i>a rad17::LEU2</i>                   | 3, S2b, S3, S5,<br>S6              |
| 7178  | <i>MAT</i> $\alpha$ <i>rad17::LEU2</i>            | S2b, S4, S5                        |
| 8460  | <i>MAT</i> <i>a WT</i>                            | S2b, S4, S5, S7,<br>S8             |
| 8530  | <i>MAT</i> <i>a ddc1::HIS3</i>                    | 3, S3, S5, S8                      |
| 9585  | <i>MAT</i> <i>a cdc13-1 rad9::HIS3</i>            | S10                                |
| 9593  | <i>MAT</i> <i>a rad9::HIS3</i>                    | 3, S2b, S3, S5,<br>S6, S7, S8, S10 |
| 10536 | <i>MAT</i> $\alpha$ <i>chk1::HIS3</i>             | S2b, S6                            |
| 10537 | <i>MAT</i> <i>a chk1::HIS3</i>                    | 3, S2b, S3, S5                     |
| 10818 | <i>MAT</i> <i>a rad9::HIS3</i>                    | S2b                                |
| 10967 | <i>MAT</i> $\alpha$ <i>rad9::HIS3 dna2::KANMX</i> | 2b, 3, 4b, S2b,<br>S3, S5, S6, S7, |

---

---

|       |                                                         |                   |                               |
|-------|---------------------------------------------------------|-------------------|-------------------------------|
|       |                                                         |                   | S8                            |
| 10968 | <i>MAT a rad9::HIS3 dna2::KANMX</i>                     | DDY874, spore 12b | 2b, S2b, S4, S5               |
| 10969 | <i>MAT α rad9::HIS3 dna2::KANMX</i>                     | DDY874, spore 17a | S2b                           |
| 10971 | <i>MAT α ddc1::HIS3 dna2::KANMX</i>                     | DDY876, spore 7b  | 2b, S2b, S4, S5,<br>S6        |
| 10972 | <i>MAT α ddc1::HIS3 dna2::KANMX</i>                     | DDY876, spore 13d | 2b, S2b                       |
| 10973 | <i>MAT α ddc1::HIS3 dna2::KANMX</i>                     | DDY876, spore 8b  | 3, 4b, S2b, S3,<br>S5, S7, S8 |
| 10975 | <i>MAT a chk1::HIS3 dna2::KANMX</i>                     | DDY878, spore 5b  | 2b, 3, S2b, S3,<br>S5, S6     |
| 10976 | <i>MAT a chk1::HIS3 dna2::KANMX</i>                     | DDY878, spore 15a | 2b, S2b, S4, S5               |
| 10977 | <i>MAT a chk1::HIS3 dna2::KANMX</i>                     | DDY878, spore 24a | S2b                           |
| 10979 | <i>MAT α rad17::LEU2 dna2::KANMX</i>                    | DDY880, spore 4b  | S2b                           |
| 10980 | <i>MAT α rad17::LEU2 dna2::KANMX</i>                    | DDY880, spore 5b  | 2b, S2b, S4, S5               |
| 10981 | <i>MAT a rad17::LEU2 dna2::KANMX</i>                    | DDY880, spore 12d | 2b, 3, S2b, S3,<br>S5, S6     |
| 11026 | <i>MAT a mec1::HIS3 sml1::KANMX</i>                     | DDY958, spore 24d | S2b                           |
| 11032 | <i>MAT a mec1::HIS3 sml1::KANMX</i><br><i>dna2::NAT</i> | DDY958, spore 6a  | 2b, 3, S2b, S3,<br>S5, S6     |
| 11033 | <i>MAT α mec1::HIS3 sml1::KANMX</i><br><i>dna2::NAT</i> | DDY958, spore 11b | 2b, S2b, S4, S5               |
| 11034 | <i>MAT a mec1::HIS3 sml1::KANMX</i><br><i>dna2::NAT</i> | DDY958, spore 15a | S2b                           |
| 11035 | <i>MAT a mec1::HIS3 sml1::KANMX</i><br><i>dna2::NAT</i> | DDY958, spore 25c | S2b                           |
| 11190 | <i>MAT a dna2::NAT pDNA2</i><br>(pDL1758)               |                   | S10                           |
| 11274 | <i>MAT α dna2::NAT pDNA2</i><br>(pDL1758)               |                   | S10                           |
| 11275 | <i>MAT a mph1::KANMX</i>                                | DDY1052, spore 1a | S10                           |

---

|       |                                                                       |                         |         |
|-------|-----------------------------------------------------------------------|-------------------------|---------|
| 11276 | <i>MAT a mph1::KANMX</i>                                              | DDY1052, spore 1b       | S10     |
| 11900 | <i>MAT a pol32::KANMX dna2::NAT</i>                                   | DDY1230, spore 1b, 23°C | S10     |
| 11901 | <i>MAT a pol32::KANMX dna2::NAT</i>                                   | DDY1230, spore 5a, 23°C | S10     |
| 12178 | <i>MAT α Cdc13-YFP Rfa1-CFP ADE2</i>                                  | From M. Lisby           |         |
| 12179 | <i>MAT a Cdc13-YFP Rfa1-CFP ADE2</i>                                  | From M. Lisby           |         |
| 12180 | <i>MAT a mph1::HPH</i>                                                | DDY1243, spore 2d       | S10     |
| 12181 | <i>MAT a mph1::HPH</i>                                                | DDY1243, spore 6d       | S10     |
| 12234 | <i>MAT a mph1::HPH dna2::NAT</i>                                      | DDY1243, spore 4a       | S10     |
| 12235 | <i>MAT α mph1::HPH dna2::NAT</i>                                      | DDY1243, spore 5d       | S10     |
| 12236 | <i>MAT α mph1::HPH dna2::NAT</i>                                      | DDY1243, spore 6c       | S10     |
| 12240 | <i>MAT a pif1::HPH</i>                                                | DDY1285, spore 1a, 30°C | S2b     |
| 12241 | <i>MAT α pif1::HPH dna2::NAT</i>                                      | DDY1285, spore 2a, 30°C | S2b     |
| 12242 | <i>MAT a pif1::HPH dna2::NAT</i>                                      | DDY1285, spore 2c, 30°C | S2b     |
| 12245 | <i>MAT α pif1::HPH dna2::NAT</i>                                      | DDY1285, spore 1a, 20°C | 2b, S2b |
| 12246 | <i>MAT a pif1::HPH dna2::NAT</i>                                      | DDY1285, spore 4a, 20°C | 2b, S2b |
| 12279 | <i>MAT a Cdc13-YFP Rfa1-CFP ADE2</i><br><i>ddc1::HIS3 dna2::KANMX</i> | DDY1333, spore 1d       | 5, S9   |
| 12280 | <i>MAT a Cdc13-YFP Rfa1-CFP ADE2</i><br><i>ddc1::HIS3</i>             | DDY1333, spore 9a       | 5, S9   |
| 12281 | <i>MAT a Cdc13-YFP Rfa1-CFP ADE2</i><br><i>ddc1::HIS3 dna2::KANMX</i> | DDY1333, spore 10a      | 5, S9   |
| 12282 | <i>MAT a Cdc13-YFP Rfa1-CFP ADE2</i><br><i>ddc1::HIS3</i>             | DDY1333, spore 11b      | 5, S9   |
| 12283 | <i>MAT a Cdc13-YFP Rfa1-CFP ADE2</i><br><i>ddc1::HIS3</i>             | DDY1333, spore 6a       | 5, S9   |
| 12284 | <i>MAT a Cdc13-YFP Rfa1-CFP ADE2</i><br><i>ddc1::HIS3 dna2::KANMX</i> | DDY1333, spore 5d       | 5, S9   |
| 12341 | <i>MAT α Cdc13-YFP Rfa1-CFP ADE2</i><br><i>ddc1::HIS3 dna2::KANMX</i> | DDY1333, spore 6c       | 5, S9   |
| 12342 | <i>MAT a Cdc13-YFP Rfa1-CFP ADE2</i>                                  | DDY1333, spore 9a       | 5, S9   |

|               |                                                                               |                          |                |
|---------------|-------------------------------------------------------------------------------|--------------------------|----------------|
| 12343         | <i>MAT α Cdc13-YFP Rfa1-CFP ADE2</i>                                          | DDY1333, spore 7b        | 5, S9          |
| 12344         | <i>MAT α Cdc13-YFP Rfa1-CFP ADE2</i><br><i>pif1::HPH dna2::NAT</i>            | DDY1351, spore 13c       | 5, S9          |
| 12345         | <i>MAT α Cdc13-YFP Rfa1-CFP ADE2</i><br><i>pif1::HPH dna2::NAT</i>            | DDY1351, spore 10b       | 5, S9          |
| 12346         | <i>MAT α Cdc13-YFP Rfa1-CFP ADE2</i><br><i>pif1::HPH</i>                      | DDY1351, spore 22d       | 5, S9          |
| 12347         | <i>MAT α Cdc13-YFP Rfa1-CFP ADE2</i><br><i>pif1::HPH</i>                      | DDY1351, spore 20c       | 5, S9          |
| <hr/>         |                                                                               |                          |                |
| <b>Strain</b> |                                                                               |                          | <b>Related</b> |
| <b>(DDY)</b>  | <b>Relevant Genotype</b>                                                      | <b>Origin</b>            | <b>Figures</b> |
| <hr/>         |                                                                               |                          |                |
| 739           | WT/WT                                                                         | 8460 x 3001              |                |
| 874           | <i>rad9::HIS3/RAD9</i><br><i>dna2::KANMX/DNA2</i>                             | Cross, <i>pDNA2</i> lost | 1, S1          |
| 876           | <i>ddc1::HIS3/DDC1</i><br><i>dna2::KANMX/DNA2</i>                             | Cross, <i>pDNA2</i> lost | 1, S1          |
| 878           | <i>chk1::HIS3/CHK1</i><br><i>dna2::KANMX/DNA2</i>                             | Cross, <i>pDNA2</i> lost | 1, S1          |
| 880           | <i>rad17::LEU2/RAD17</i><br><i>dna2::KANMX/DNA2</i>                           | Cross, <i>pDNA2</i> lost | 1, S1          |
| 947           | <i>rad53::HIS3/RAD53</i><br><i>sml1::URA3/SML1</i><br><i>dna2::KANMX/DNA2</i> | Cross, <i>pDNA2</i> lost | 1, S1          |
| 950           | <i>tel1::NAT/TEL1 dna2::KANMX/DNA2</i>                                        | Cross, <i>pDNA2</i> lost | 1, S1          |
| 952           | <i>sml1::URA3/SML1</i><br><i>dna2::KANMX/DNA2</i>                             | Cross, <i>pDNA2</i> lost | 1, S1          |
| 958           | <i>mec1::HIS3/MEC1</i>                                                        | Cross, <i>pDNA2</i> lost | 1, S1          |
| <hr/>         |                                                                               |                          |                |

---

|      |                                                                                                   |                            |       |
|------|---------------------------------------------------------------------------------------------------|----------------------------|-------|
|      | <i>sml1::KANMX/SML1</i>                                                                           |                            |       |
|      | <i>dna2::NAT/DNA2</i>                                                                             |                            |       |
| 1052 | <i>mph1::KANMX/MPH1 cdc13-1/CDC13</i>                                                             | Cross                      | S10   |
| 1130 | <i>sgs1::KANMX/SGS1 dna2::NATMX/DNA2</i>                                                          | Cross, <i>pDNA2</i> lost   | S10   |
| 1230 | <i>pol32::KANMX/POL32 dna2::NAT/DNA2</i>                                                          | Cross, <i>dna2::NAT</i>    | S10   |
| 1243 | <i>mph1::HPH/MPH1 dna2::NAT/DNA2</i>                                                              | DDY1276, <i>mph1::HPH</i>  | S10   |
| 1276 | <i>dna2::NAT/DNA2</i>                                                                             | DDY739, <i>dna2::NAT</i>   | 1, S1 |
| 1285 | <i>pif1::HPH/PIF1 dna2::NAT/DNA2 rad9::HIS3/RAD9</i>                                              | DDY1276, <i>pif1::HPH</i>  | 1, S1 |
| 1303 | <i>dna2::KANMX/DNA2 rad52::HPH/RAD52 ddc1::HIS3/DDC1</i>                                          | DDY874, <i>rad52::HPH</i>  | S7    |
| 1305 | <i>dna2::KANMX/DNA2 rad52::HPH/RAD52</i>                                                          | DDY876, <i>rad52::HPH</i>  | S7    |
| 1309 | <i>dna2::KANMX/DNA2 rad52::HPH/RAD52</i>                                                          | DDY1276, <i>rad52::HPH</i> | S7    |
| 1311 | <i>rad52::HPH/RAD52 ddc1::HIS3/DDC1</i>                                                           | DDY739, <i>rad52::HPH</i>  | S7    |
| 1333 | <i>dna2::KANMX/DNA2 Cdc13-YFP/CDC13 Rfa1-CFP/RFA1 ade2-1/ADE2 pif1::HPH/PIF1 dna2::KANMX/DNA2</i> | 12179 x 10973 (p6)         | 5, S9 |
| 1351 | <i>Cdc13-YFP/CDC13 Rfa1-CFP/RFA1 ade2-1/ADE2</i>                                                  | 12178 x 12246 (p6)         | 5, S9 |

---

**Table S2. List of plasmids used. Related figures indicated.**

| <b>Plasmid Number</b> | <b>Details</b>                                        | <b>Source (Related Figures)</b>                                                                                                |
|-----------------------|-------------------------------------------------------|--------------------------------------------------------------------------------------------------------------------------------|
| pDL1367               | 2 $\mu$ - <i>URA3</i>                                 | pYEP24 (4, S8)                                                                                                                 |
| pDL1369               | 2 $\mu$ - <i>URA3-DNA2</i>                            | Zhu <i>et al</i> , Cell 2008 19;134(6):981-94 (4b, S8)                                                                         |
| pDL1371               | 2 $\mu$ - <i>URA3-dna2-R1253Q</i>                     | Zhu <i>et al</i> , Cell 2008 19;134(6):981-94 (4b, S8)                                                                         |
| pDL1373               | 2 $\mu$ - <i>URA3-dna2-E675A</i>                      | Zhu <i>et al</i> , Cell 2008 19;134(6):981-94 (4b, S8)<br>Pfander and Diffley, The EMBO Journal 2011 30:<br>4897-4907 (4b, S8) |
| pDL1539               | pRS314- <i>TRP1</i>                                   | Kumar and Burgers, Genes and Development 2013<br>27: 313-321 (4b, S8)                                                          |
| pDL1544               | pRS314- <i>TRP1-DNA2</i><br>pRS314- <i>TRP1-dna2-</i> | Kumar and Burgers, Genes and Development 2013<br>27: 313-321 (4, S8)                                                           |
| pDL1561               | <i>W128A, Y130A</i>                                   | Goldstein, A. and J. McCusker, Yeast 1999                                                                                      |
| pDL1758               | pAG36:: <i>CAN1-URA3-DNA2</i>                         | 15(14):1541-53 (S10)                                                                                                           |

# Figure S1

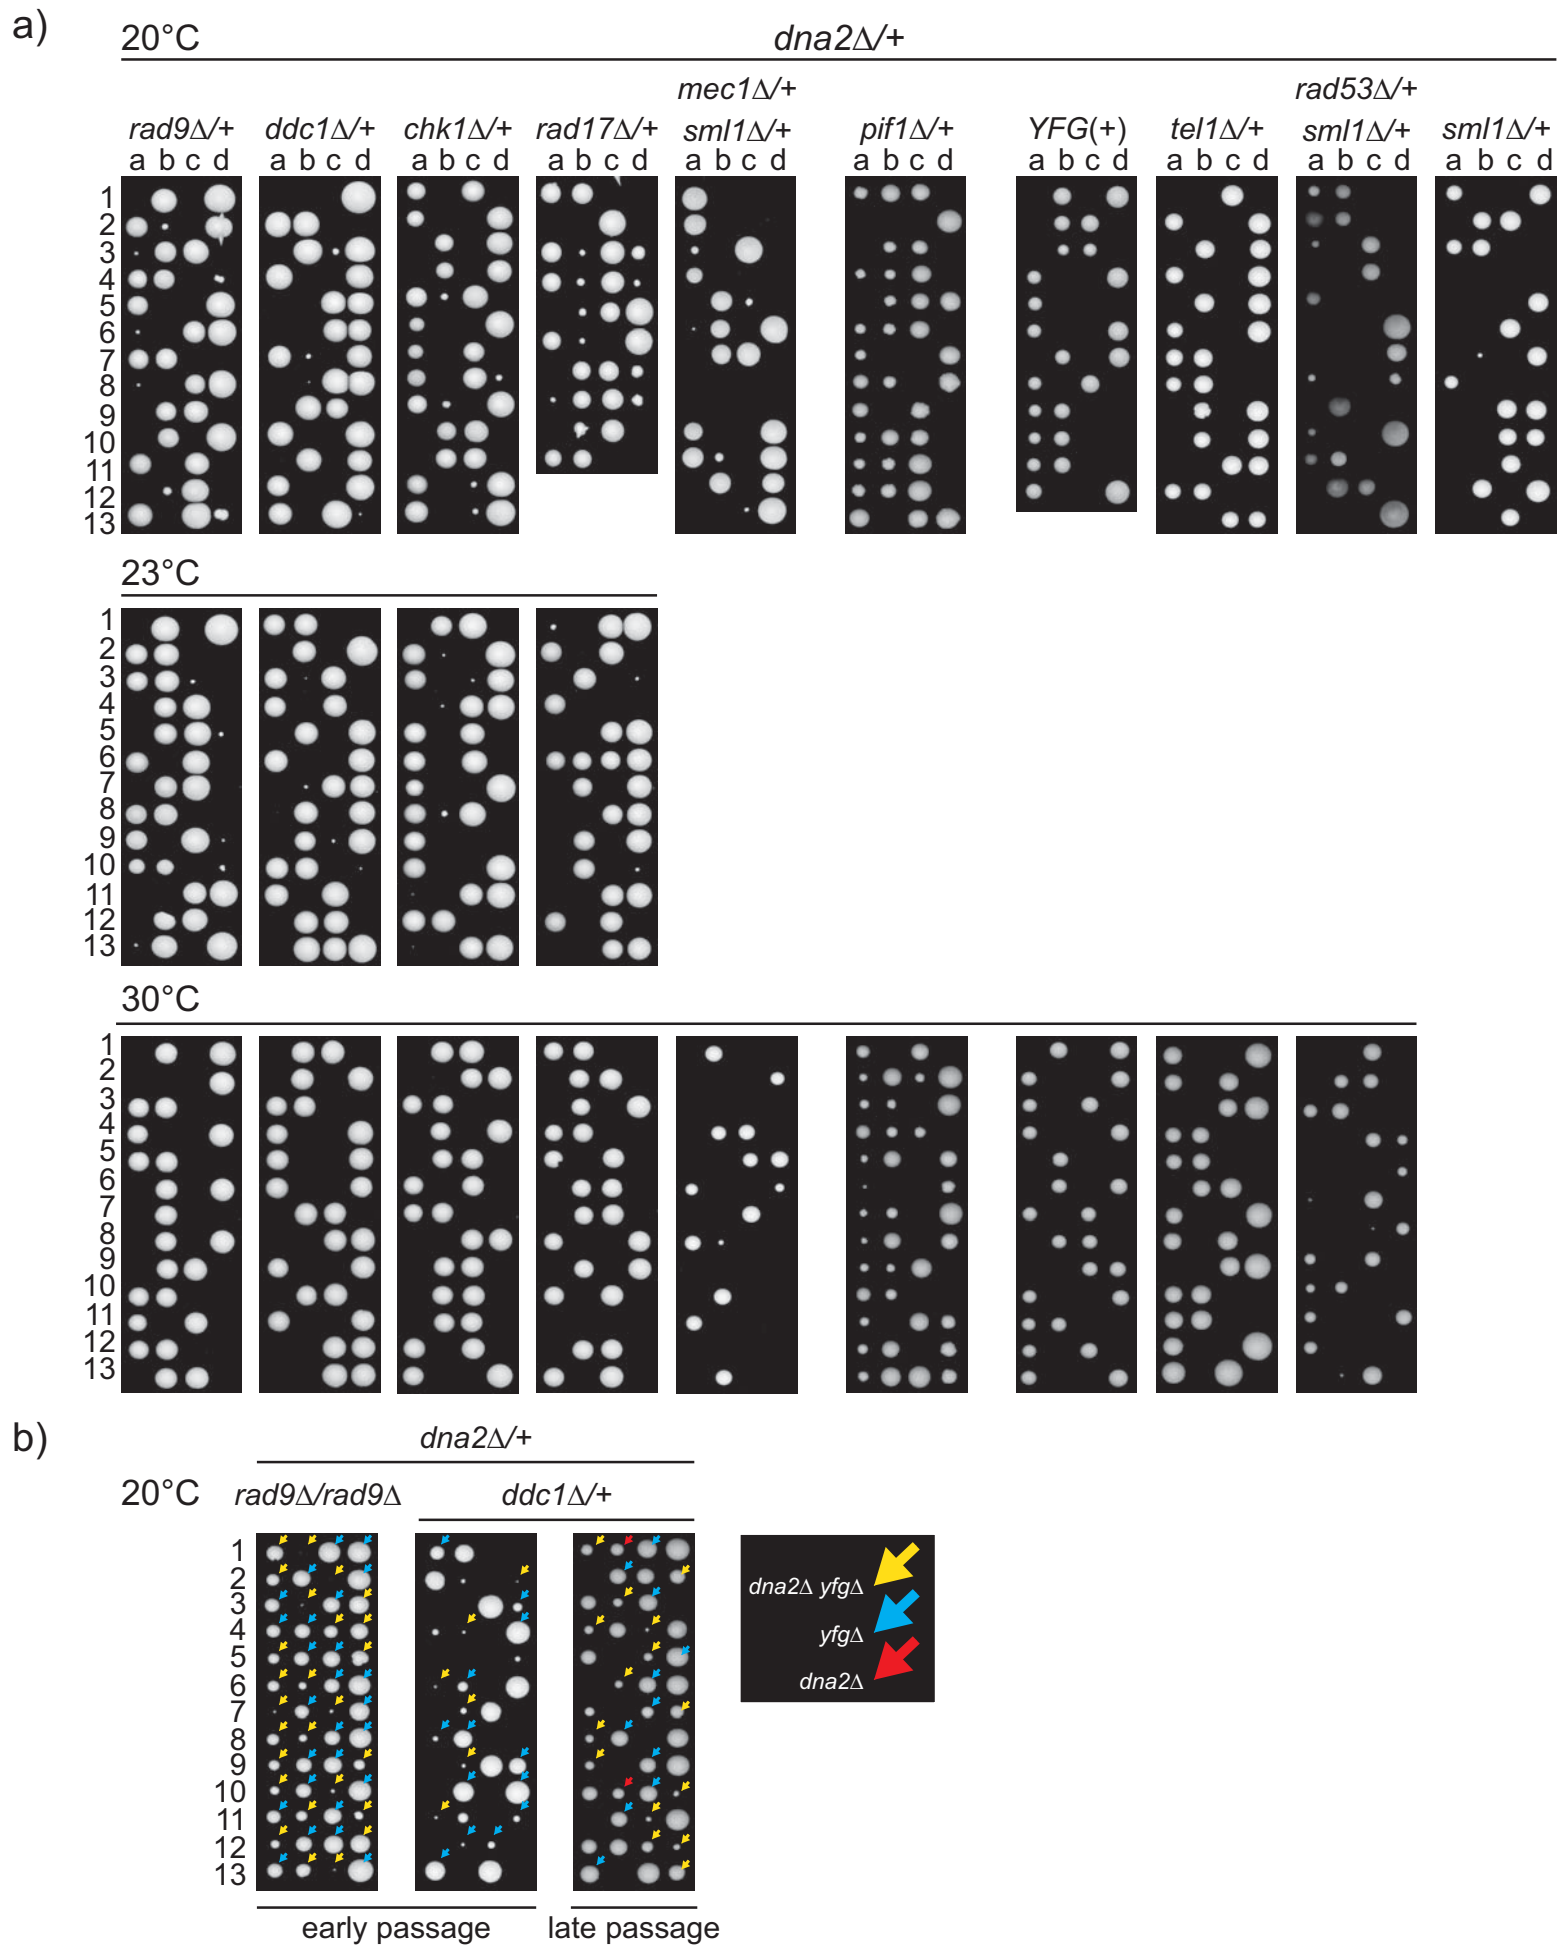

**Figure S1. Checkpoint gene deletions affect *dna2Δ* viability.**

Germination plates as in Figure 1. a) Spores were germinated at 20°C, 23°C and 30°C for 10-11, 7 and 3-4 days before photographing, respectively. Strains were: DDY1285, DDY874, DDY876, DDY878, DDY880, DDY958, DDY950, DDY947, DDY952, DDY1276, strain details are in Suppl. Table 1. b) *dna2Δ checkpointΔ* strains from passage 2 (early passage) or passage 6 (late passage) were crossed to *rad9Δ* or WT strain. *dna2Δ* strains are highlighted in red. Strains were: *dna2Δ rad9Δ* (DLY10967) x *rad9Δ* (DLY9593), *dna2Δ ddc1Δ* (DLY10973) x WT (DLY8460).



# Figure S2

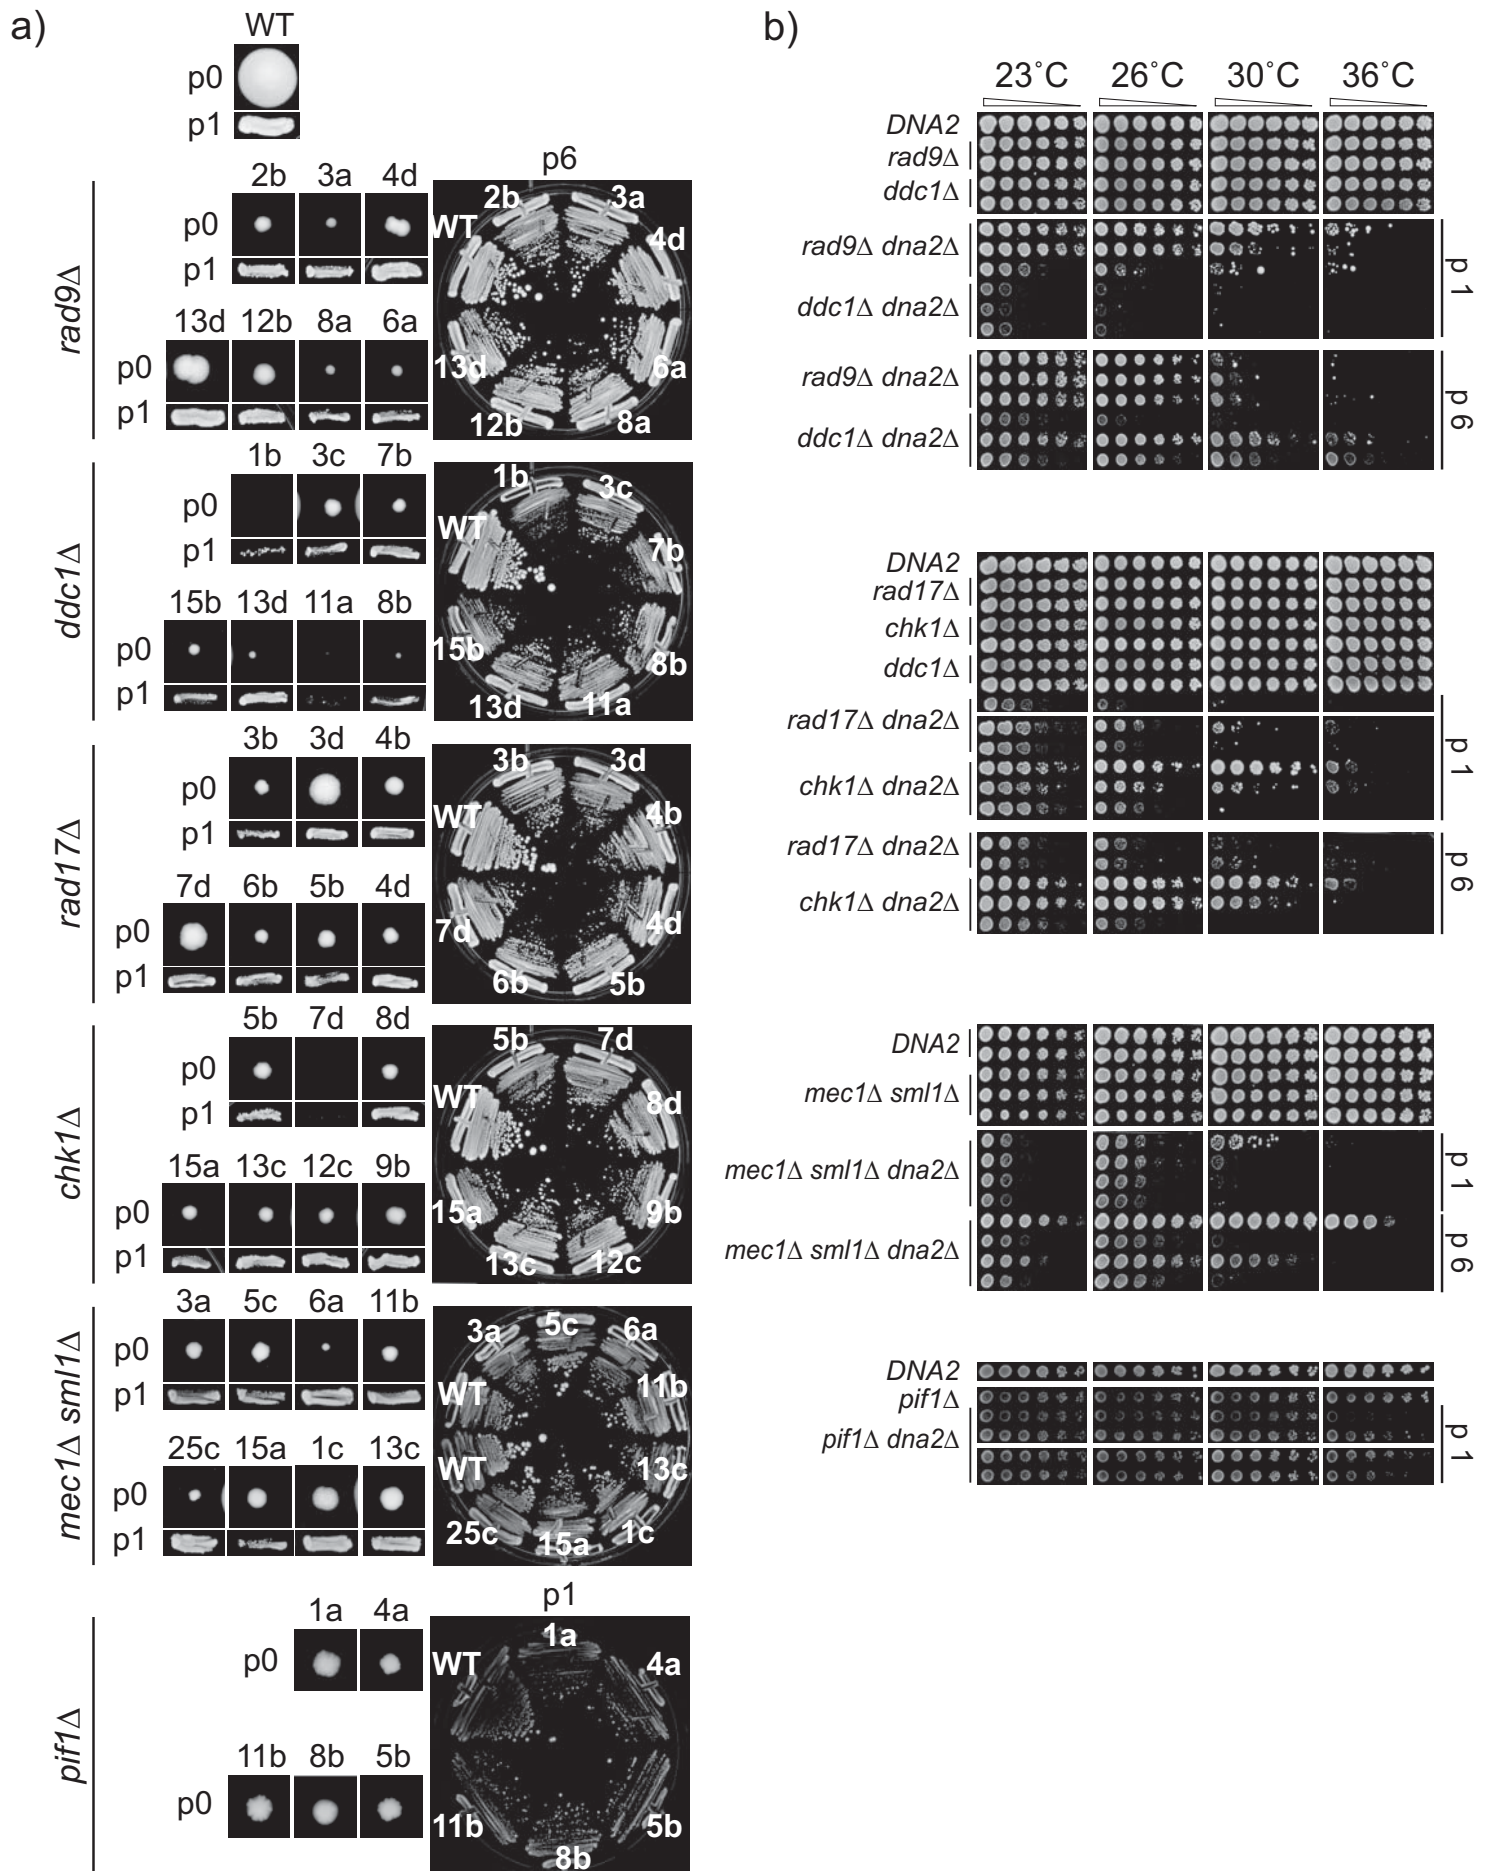

**Figure S3**

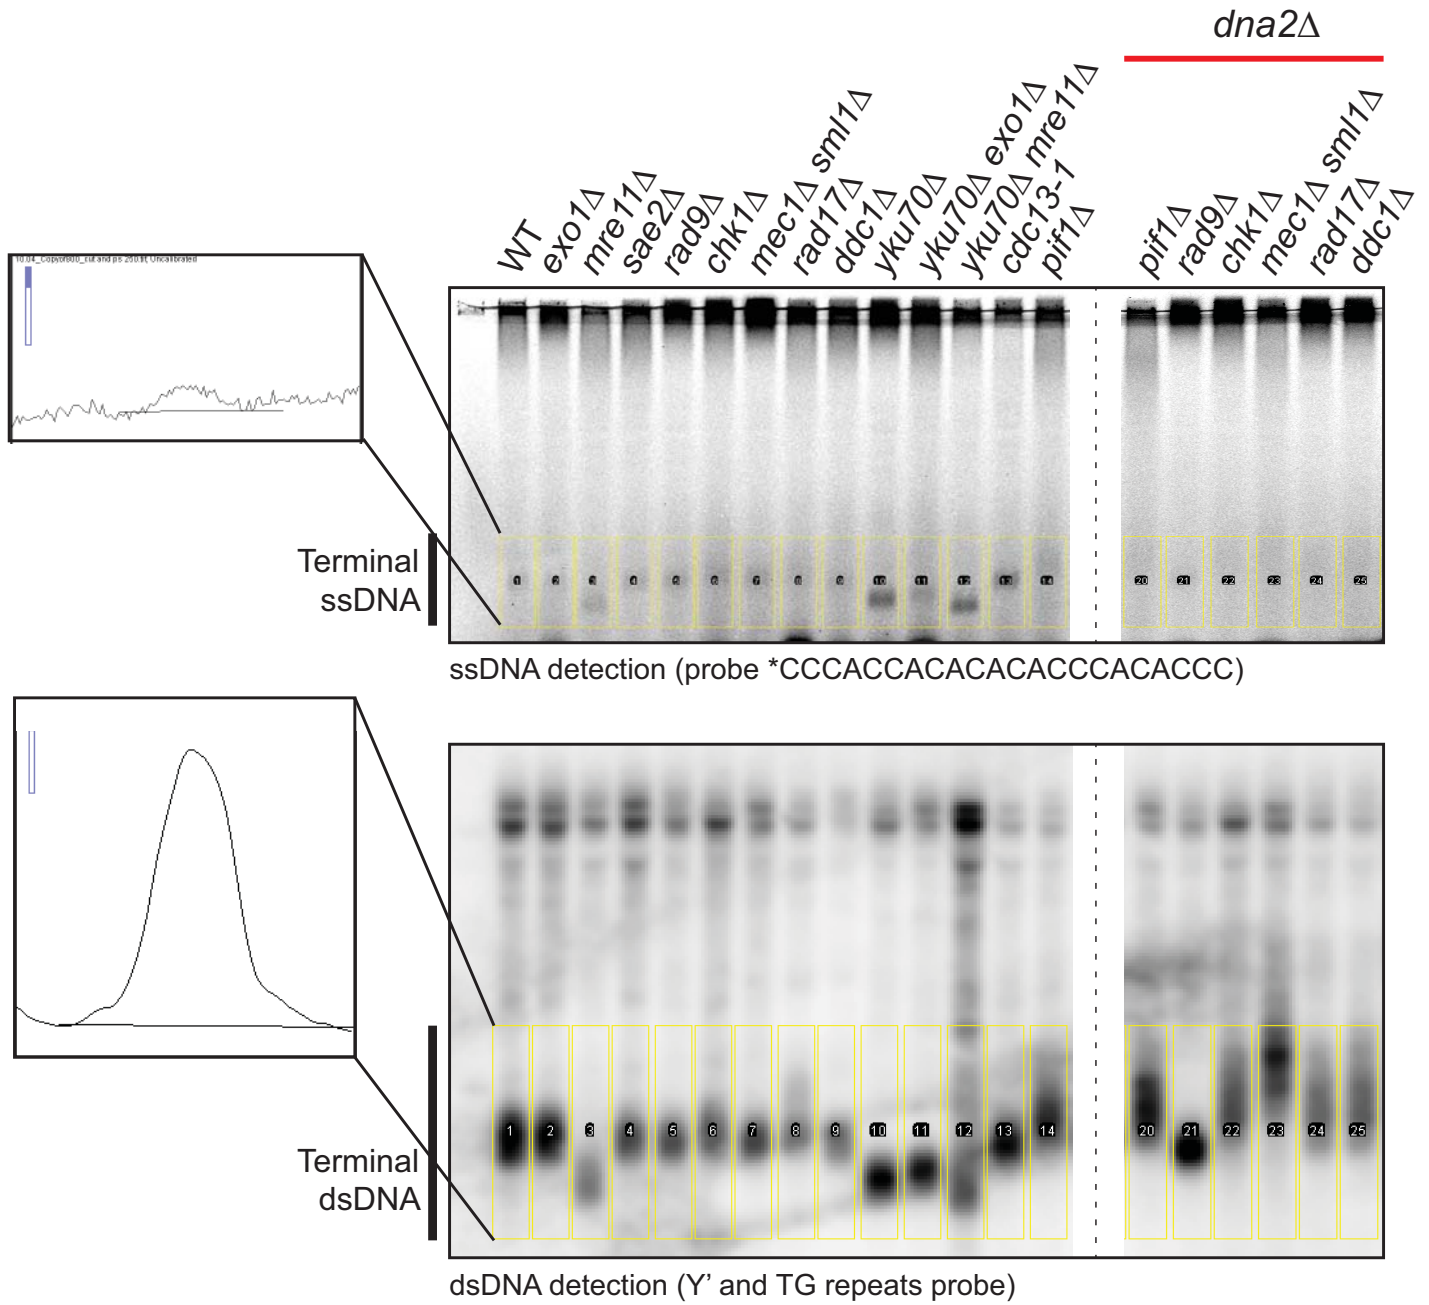

**Figure S3. ssDNA and dsDNA quantification.**

Telomeric regions from Figure 3 were quantified using an ImageJ software, indicated by yellow rectangulars. ssDNA was quantified from in-gel assay (top panel), and dsDNA from a Southern blot (bottom panel). Graphs generated in ImageJ for a WT sample and the cut offs are shown.

# Figure S4

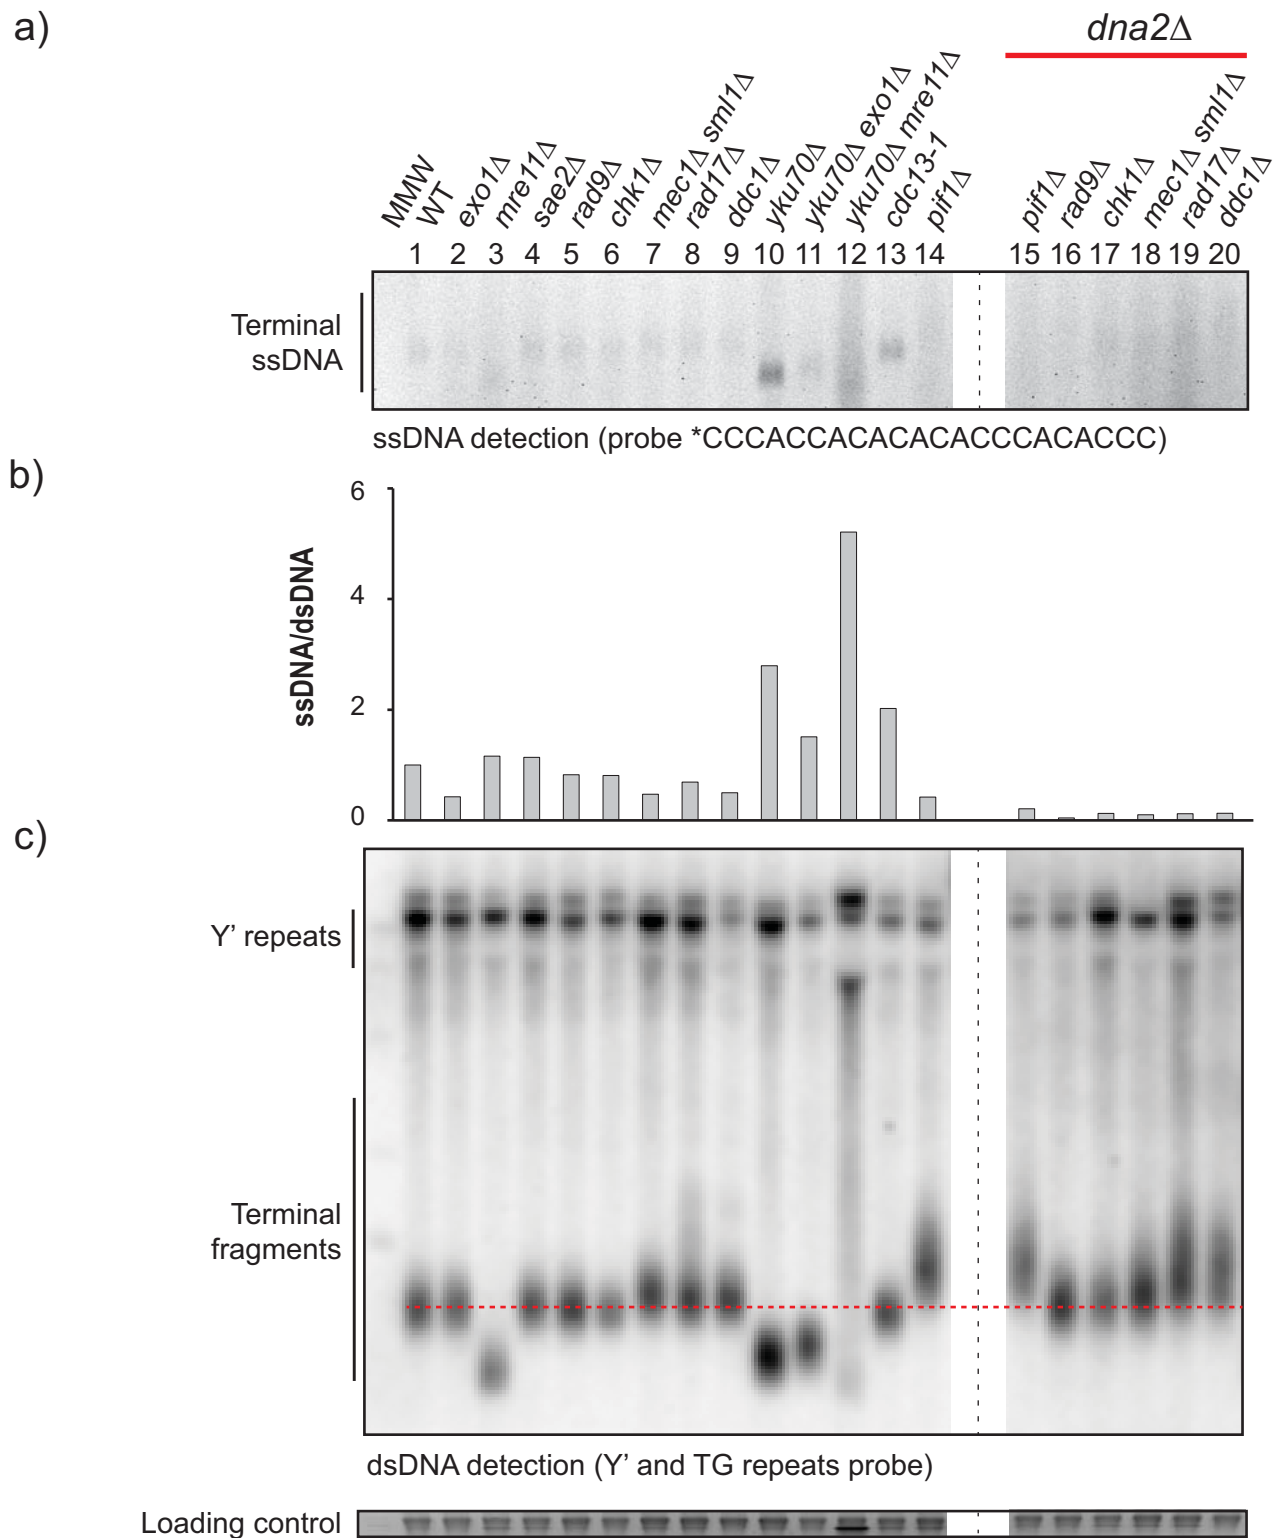

**Figure S4. Telomeres of *dna2*Δ strains are abnormal and have low levels of ssDNA.**

a-c) In-gel and Southern blot analysis of independent strains of the same genotypes as shown in Figure 3. Strains were: WT (DLY8460), *exo1*Δ (DLY1273), *mre11*Δ (DLY4458), *sae2*Δ (DLY1578), *rad9*Δ (DLY658), *chk1*Δ (DLY1095), *mec1*Δ *sml1*Δ (DLY6855), *rad17*Δ (DLY7178), *ddc1*Δ (DLY7173), *yku70*Δ (DLY1412), *yku70*Δ *exo1*Δ (DLY1409), *yku70*Δ *mre11*Δ (DLY1846), *cdc13-1* (DLY1195), *pif1*Δ (DLY5394), *pif1*Δ *dna2*Δ (DLY4691), *rad9*Δ *dna2*Δ (DLY10968), *chk1*Δ *dna2*Δ (DLY10976), *mec1*Δ *sml1*Δ *dna2*Δ (DLY11033), *rad17*Δ *dna2*Δ (DLY10980), *ddc1*Δ *dna2*Δ (DLY10971). Strain details are in Suppl. Table 1.

# Figure S5

a)

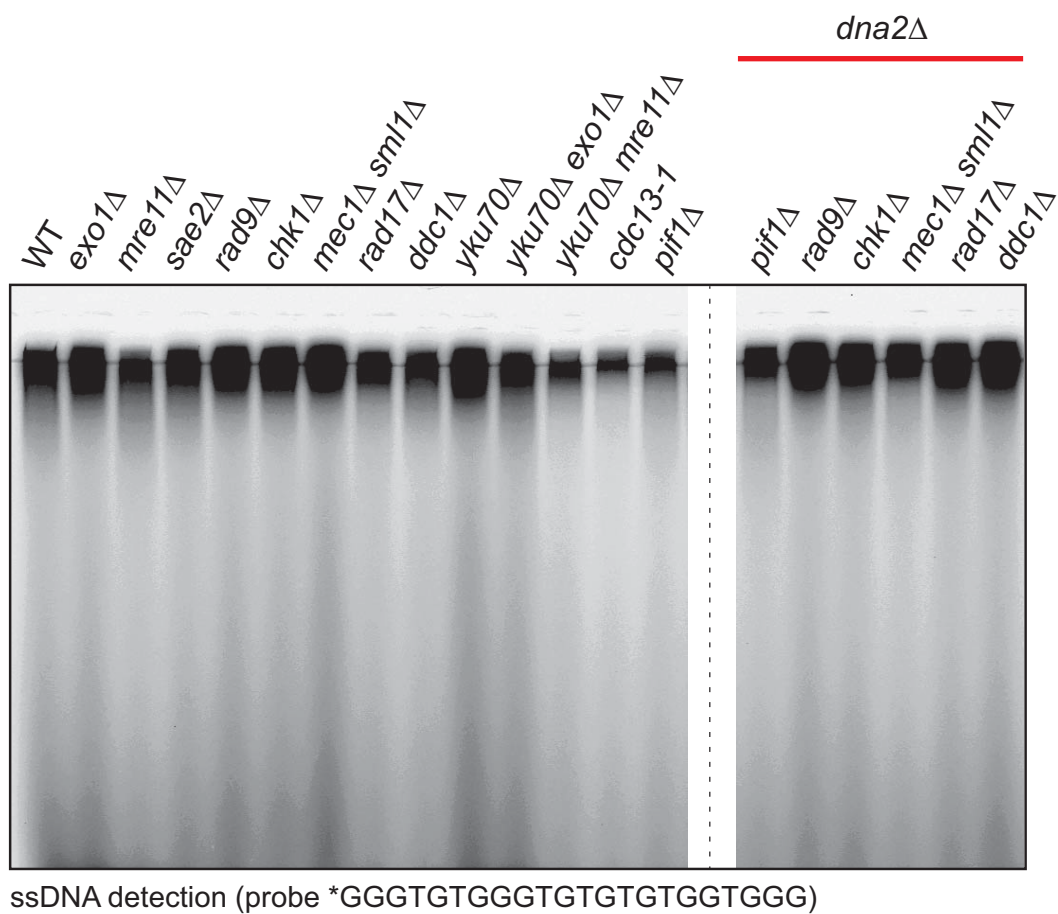

b)

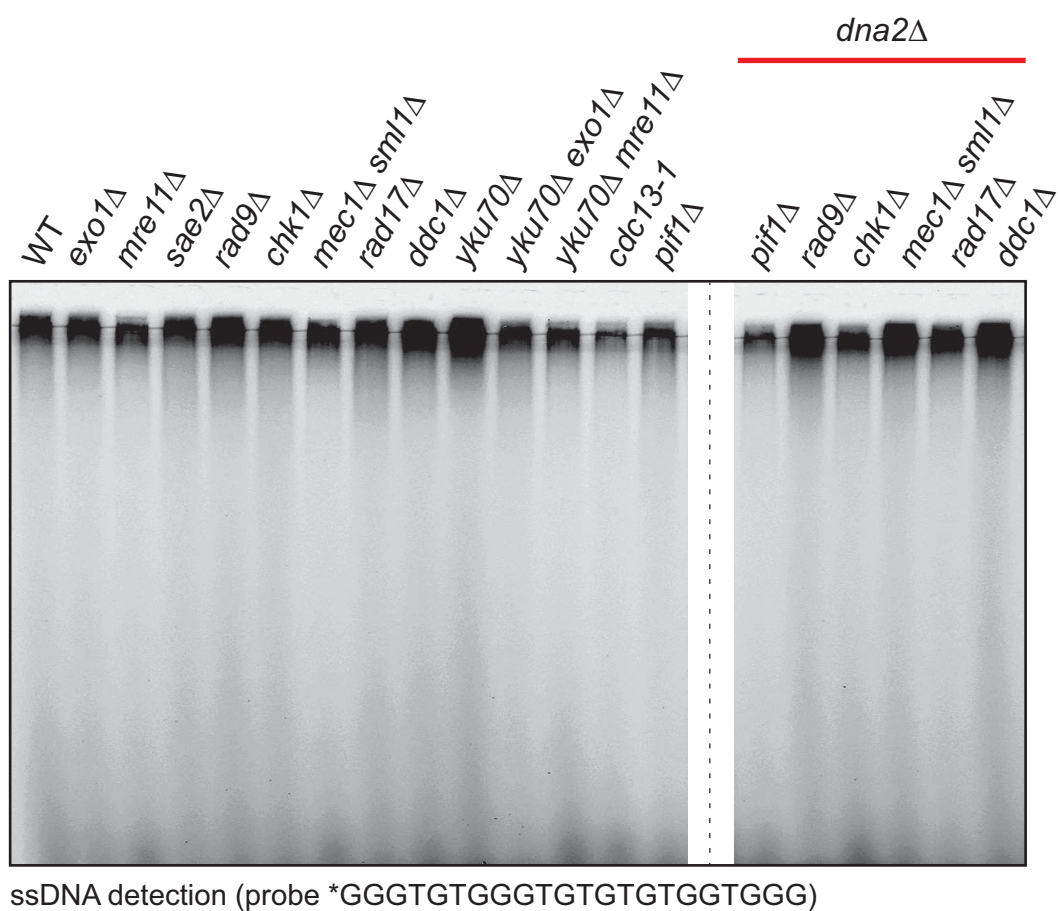

## Figure S5. C-rich strand is not detected by in-gel assay.

In-gel assays performed as in Figure 3, except that TG probe rather than AC probe was used.

a) An in-gel assay on strains from Figure 3. b) An in-gel assay on strains from Figure S4.

**Figure S6**

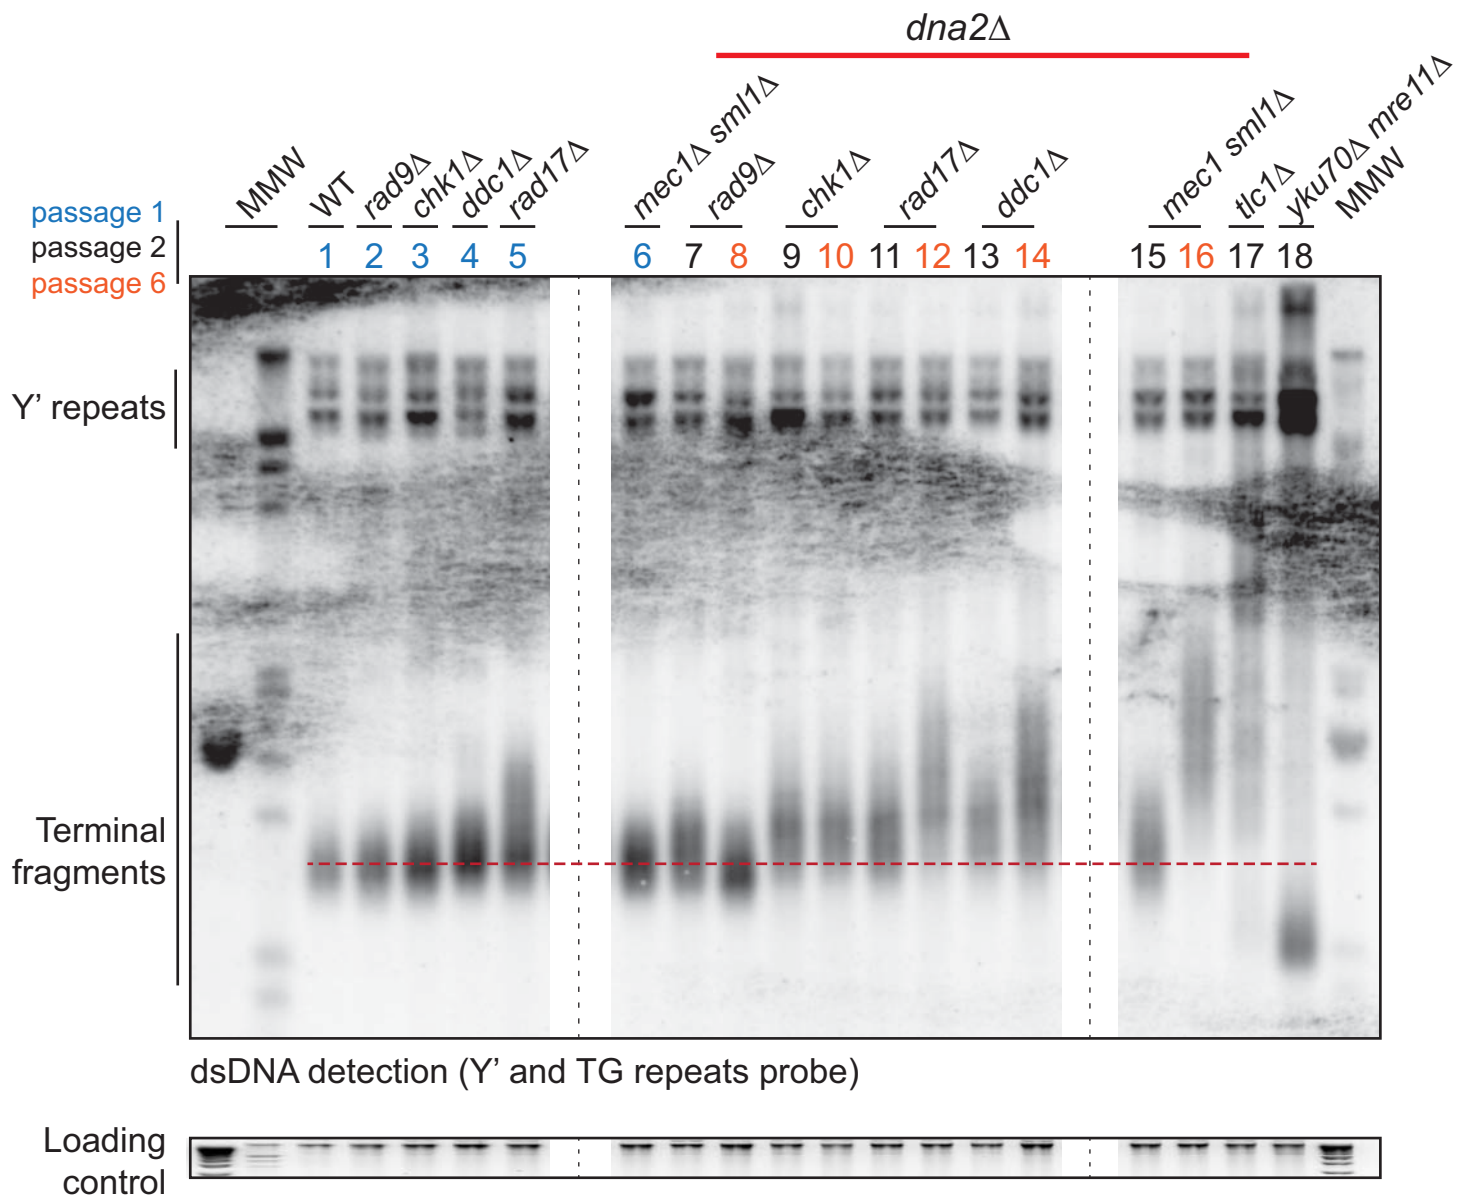

**Figure S6. Telomeres of *dna2Δ* strains are abnormal.**

Southern blot performed as described previously (Maringele and Lydall, 2004). DNA was isolated from yeast strains grown in 2 mL YEPD until saturation at 23°C. Strains were: WT (DLY3001), *rad9Δ* (DLY9593), *chk1Δ* (DLY10536), *ddc1Δ* (DLY7173), *rad17Δ* (DLY7177), *mec1Δ sml1Δ* (DLY1326), *rad9Δ dna2Δ* (DLY10967), *chk1Δ dna2Δ* (DLY10975), *rad17Δ dna2Δ* (DLY10981), *ddc1Δ dna2Δ* (DLY10971), *mec1Δ sml1Δ dna2Δ* (DLY11032), *tlc1Δ* (DLY2147), *yku70Δ mre11Δ* (DLY1845). Strain details are in Suppl. Table 1.

# Figure S7

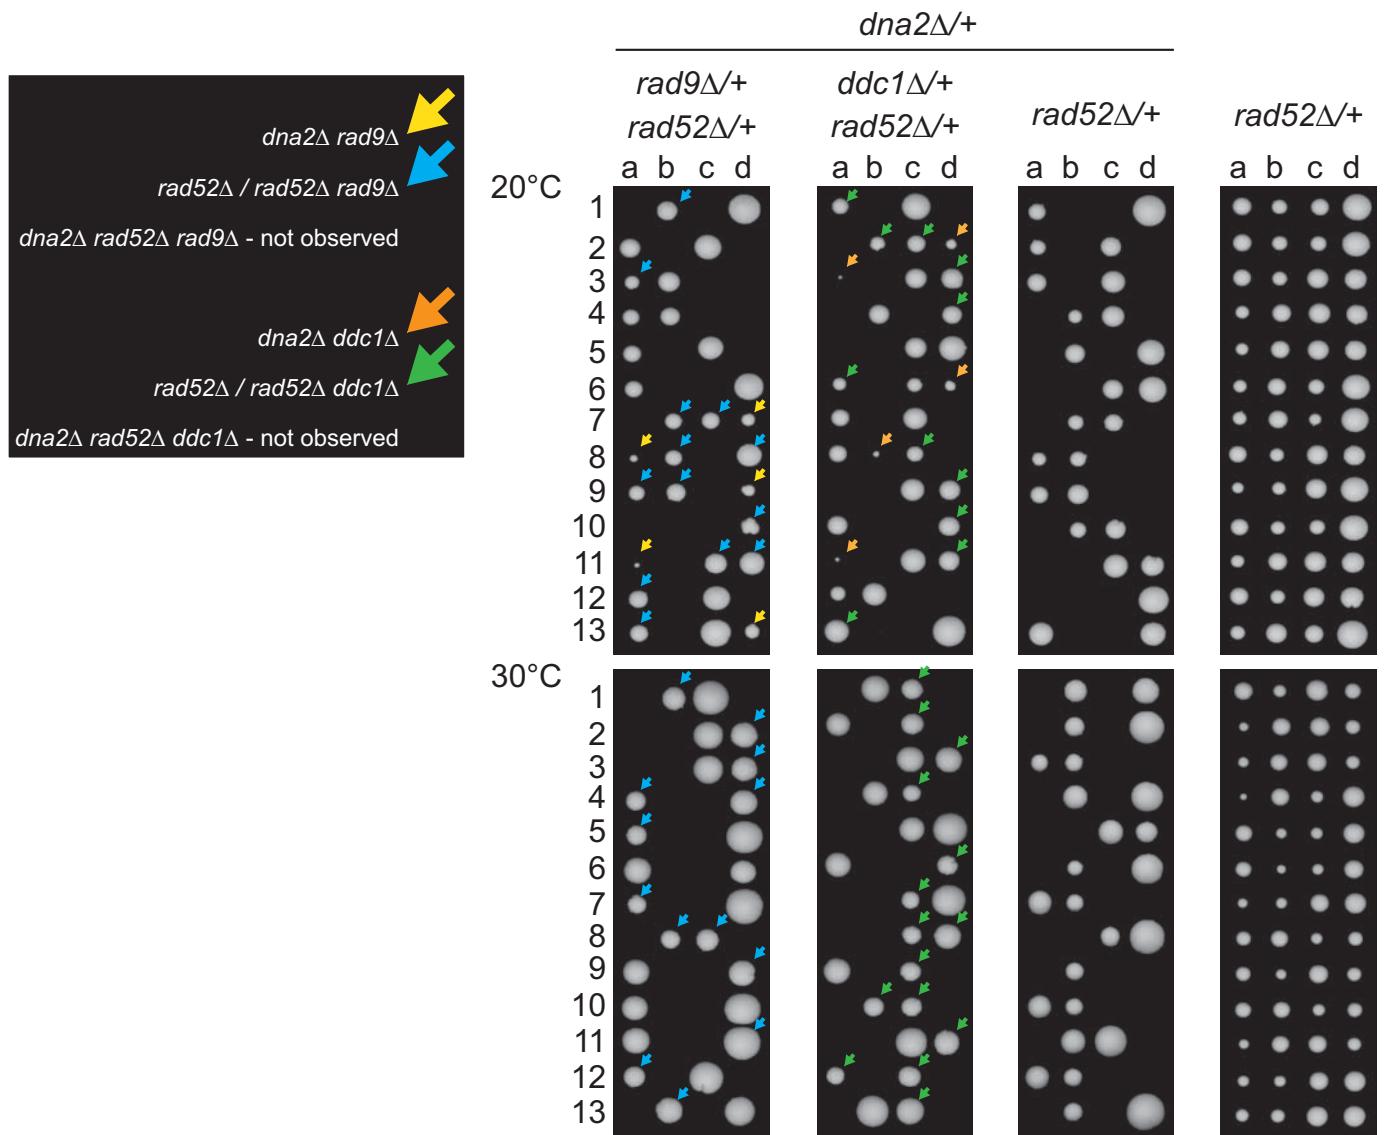

**Figure S7. Suppression of *dna2Δ* is HR-dependent.**

*RAD52* gene was deleted in DDY874 (DDY1303), DDY876 (DDY1305), DDY1276 (DDY1309) and DDY739 (DDY1311). Diploids were sporulated and germinated as in Figure 1. Arrows indicate colonies of appropriate genotypes, shown on the left. Strain details are in Suppl. Table 1.

**Figure S8**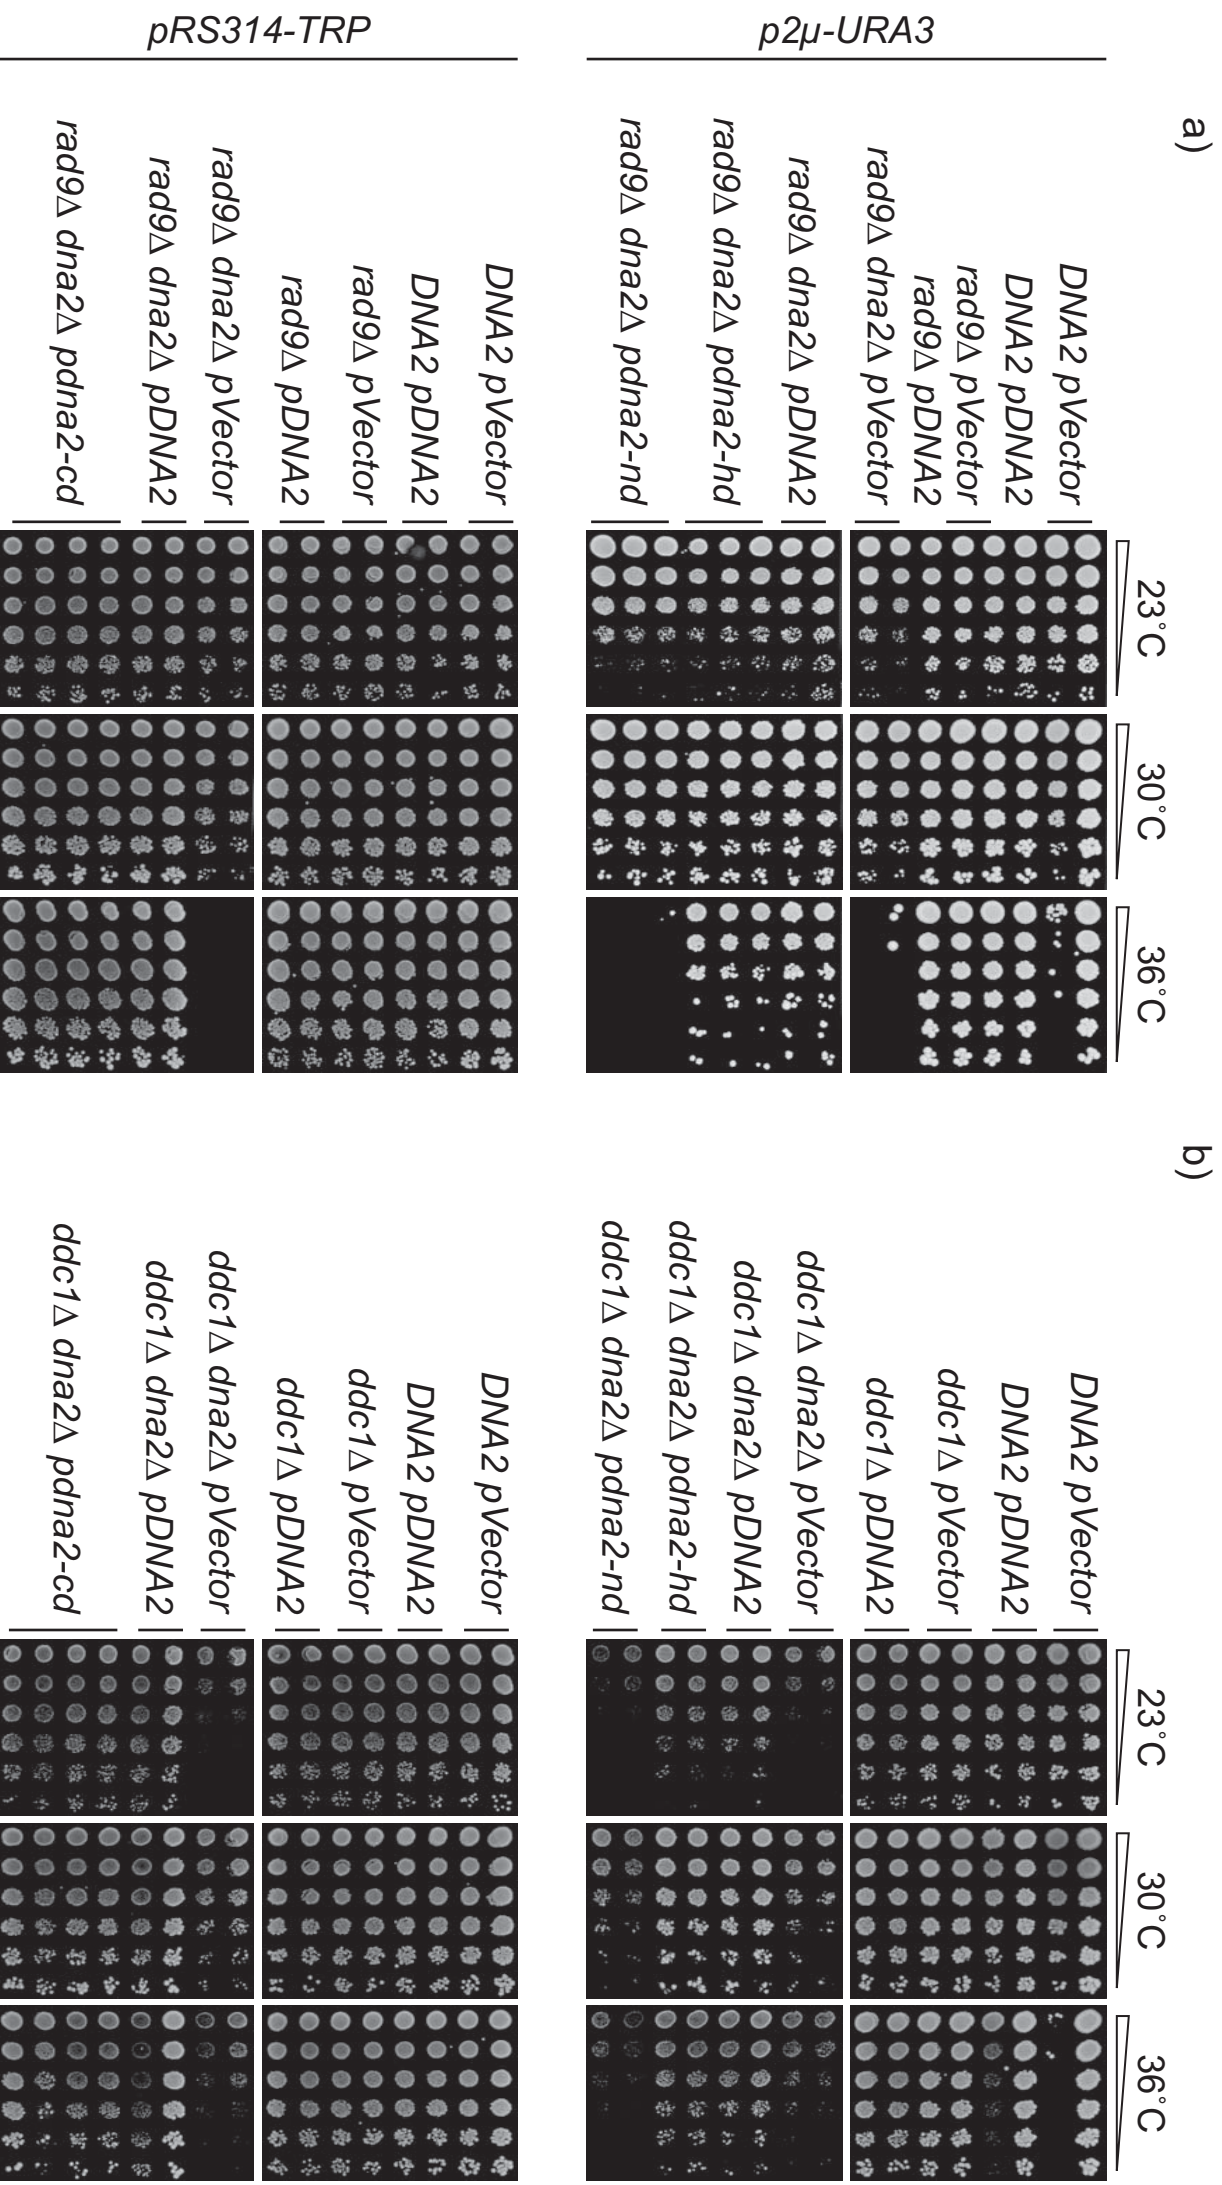**Figure S8. The nuclease domain of Dna2, but not helicase or checkpoint domains, confers viability of dna2Δ strains.**

Spot test assays performed as in Figure 4b. WT (DLY3001), *rad9Δ* (DLY9593), *rad9Δ dna2Δ* (DLY10967) (a) and WT (DLY3001), *ddc1Δ* (DLY8530), *ddc1Δ dna2Δ* (DLY10973) (b) strains carried plasmids: *pVector* ( $2\mu$ -*URA3*), *pDNA2* ( $2\mu$ -*URA3*-*DNA2*), *pdna2-hd* (*dna2*-helicase dead),  $2\mu$ -*URA3*-*dna2-R1253Q*), *pdna2-nd* (*dna2*-nuclease dead),  $2\mu$ -*URA3*-*dna2-E675A*), *pVector* (*pRS314-TRP1*), *pDNA2* (*pRS314-TRP1*-*DNA2*), *pdna2-cd* (*dna2*-checkpoint-dead), *pRS314-TRP1*-*dna2-W128A*, *Y130A*).

## Figure S9

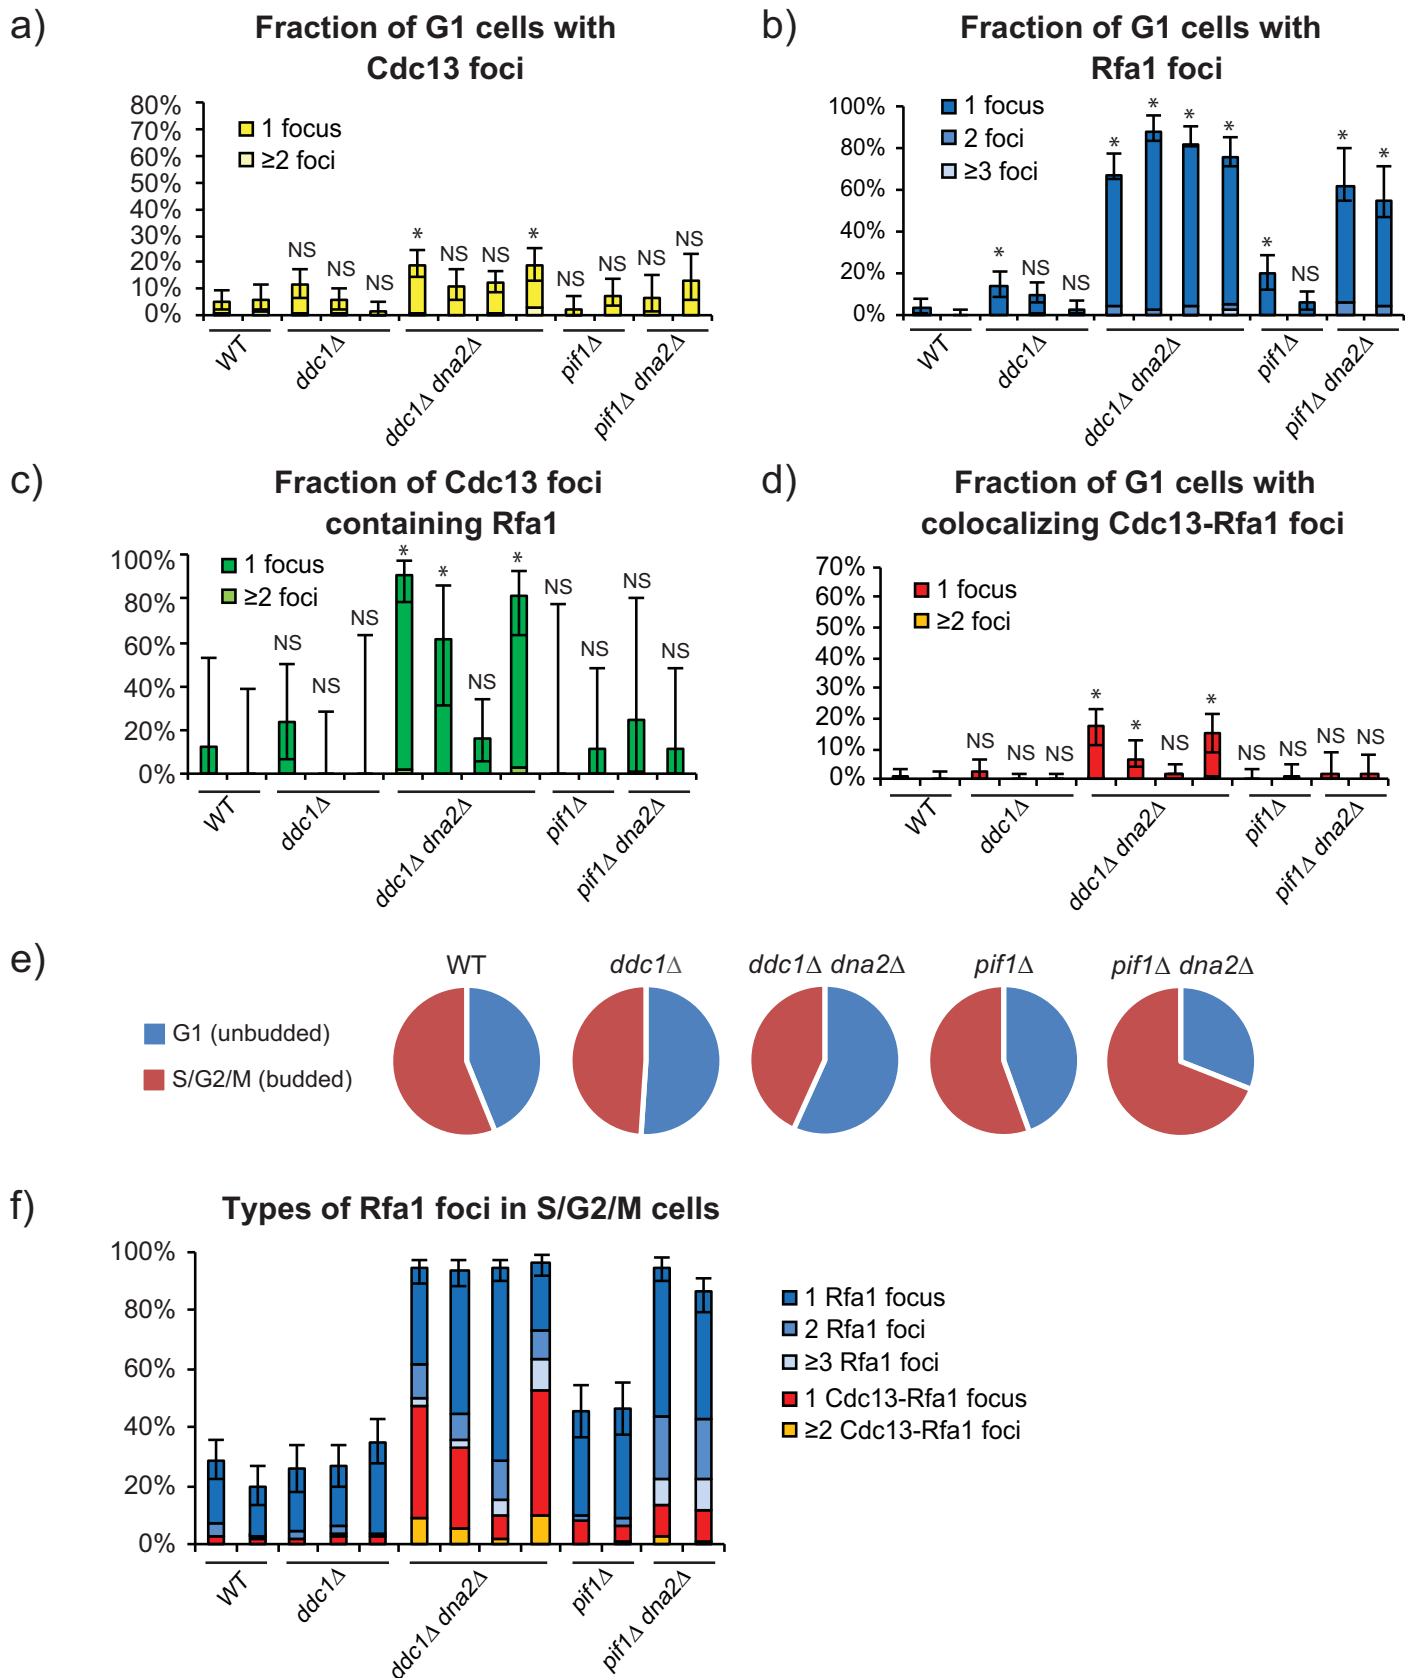

**Figure S9. *dna2Δ* mutants accumulate CST and RPA, the ssDNA binding complexes.**

Percentages of Cdc13 foci, Rfa1 foci or colocalized Cdc13–Rfa1 foci in *dna2Δ* and control strains are shown. a) Percentage of unbudded (G1) cells with either Cdc13 foci only or Cdc13–Rfa1 foci. b) Percentage of unbudded cells with either Rfa1 foci only or Cdc13–Rfa1 foci. c) Percentage of Cdc13 foci that colocalize with Rfa1 foci. d) Percentage of unbudded cells with colocalizing Cdc13–Rfa1 foci. Error bars indicate 95 % confidence intervals (n=213–437, from two independent cultures of each strain).

\* - statistical significance (p<0.05) determined using Fisher's exact test. NS - not significant. Strains are: WT (DLY12342, DLY12343), *ddc1Δ* (DLY12282, DLY12280, DLY12283), *ddc1Δ dna2Δ* (DLY12281, DLY12341, DLY12284, DLY12279), *pif1Δ* (DLY12346, DLY12347), *pif1Δ dna2Δ* (DLY12344, DLY12345). e) Cell cycle distribution of cells from panels a-d) was determined based on cell morphology (budded (S/G2/M) versus unbudded (G1)). f) Separation of Rfa1 foci into telomeric (Cdc13 colocalizing) and non-telomeric (non-Cdc13 colocalizing) foci for S/G2/M cells. Strain details are in Suppl. Table 1.



# Figure S10

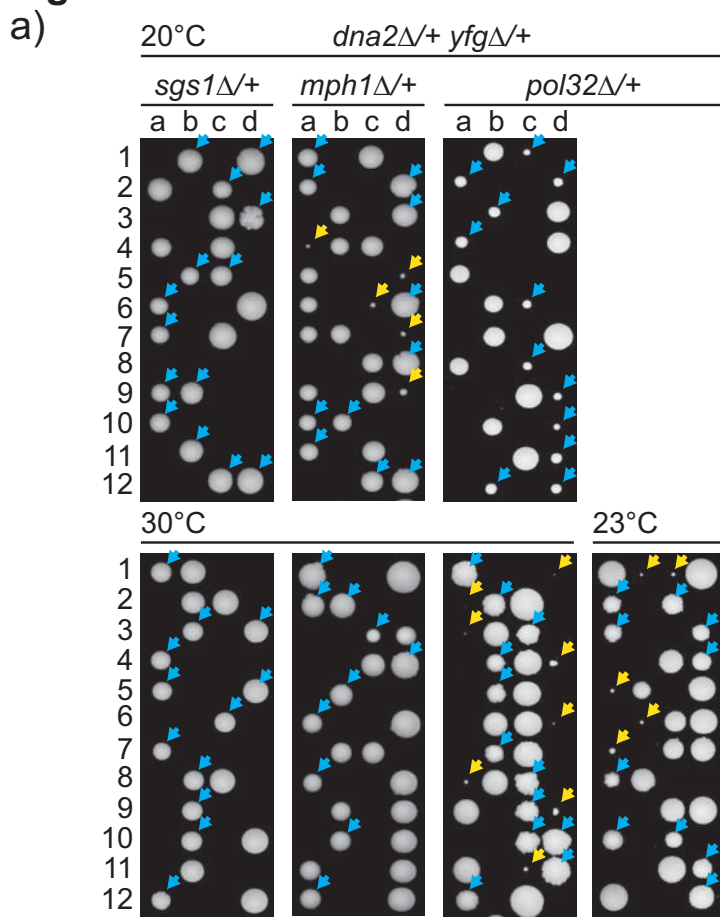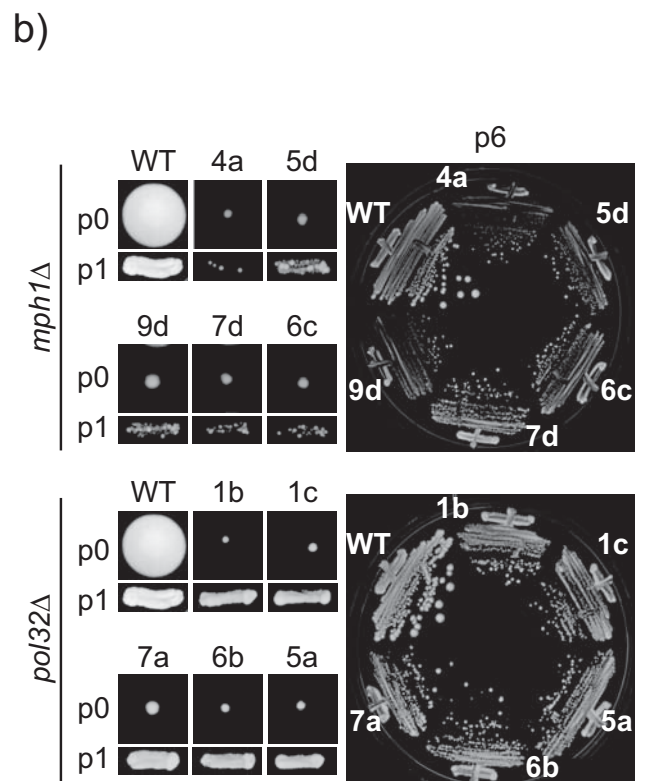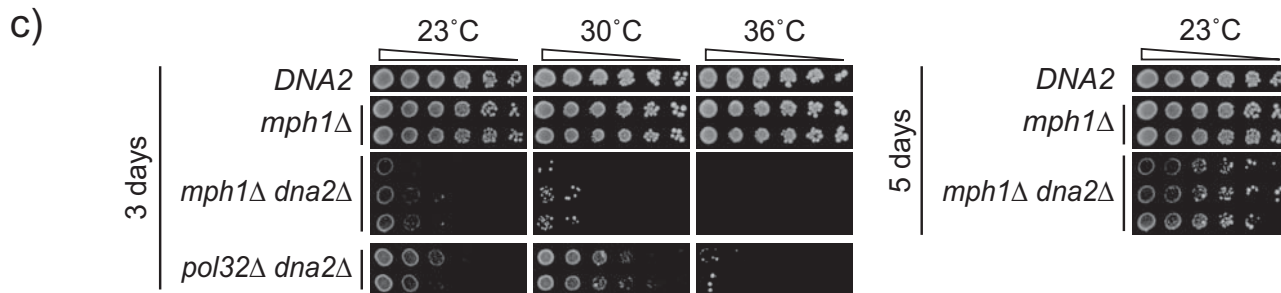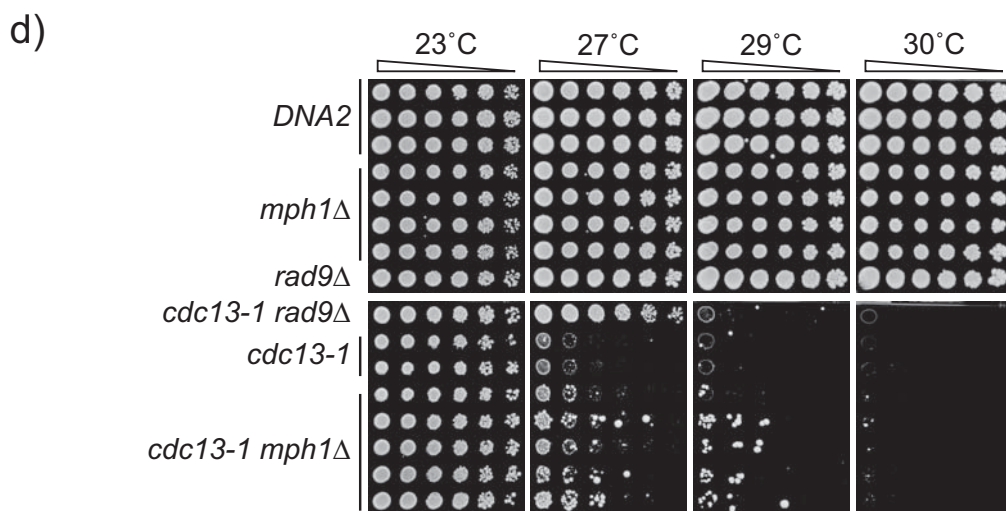

**Figure S10. Deletion of *MPH1* and *POL32*, but not *SGS1*, suppress *dna2Δ* similarly to *checkpointΔ*.**

a) Germination plates as in Figure 1. Spores were germinated at 20°C, 23°C and 30°C for 10, 7 and 3 days before photographing, respectively. Strains of *dna2Δ yfgΔ* background are indicated by yellow arrows, and strains of *yfgΔ* background are indicated by blue arrows. Strains were: DDY1130, DDY1243, DDY1230, strain details are in Suppl. Table 1. b-c) *dna2Δ* strains improve growth with passage, but remain temperature sensitive. b) Colony sizes from spores (passage 0), p1 and p6 of viable *dna2Δ* mutants, as in Figure 2a. c) Spot test assays as in Figure 2b. Strains were: WT (DLY3001), *mph1Δ* (DLY12180, DLY12181), *mph1Δ dna2Δ* (DLY12234, DLY12235, DLY12236), *pol32Δ dna2Δ* (DLY11900, DLY11901). d) *mph1Δ* suppresses growth defect of telomere defective *cdc13-1* strains. Spot test assays as in Figure 2b. Strains were: WT (DLY3001), *dna2Δ pDNA2* (DLY11190, DLY11274), *mph1Δ* (DLY4282, DLY4283, DLY11275, DLY11276), *rad9Δ* (DLY9593), *rad9Δ cdc13-1* (DLY9585), *cdc13-1* (DLY1108, DLY1195), *mph1Δ cdc13-1* (DLY4106, DLY4107, DLY4108, DLY4285, DLY4286). Strain details are in Suppl. Table 1.
